# Supplementary material
Source: Springer Nature journal article supplement (https://www.springermedizin.de/resource/supplementary/12881_2008_434_MOESM1_ESM.pdf/9450646)

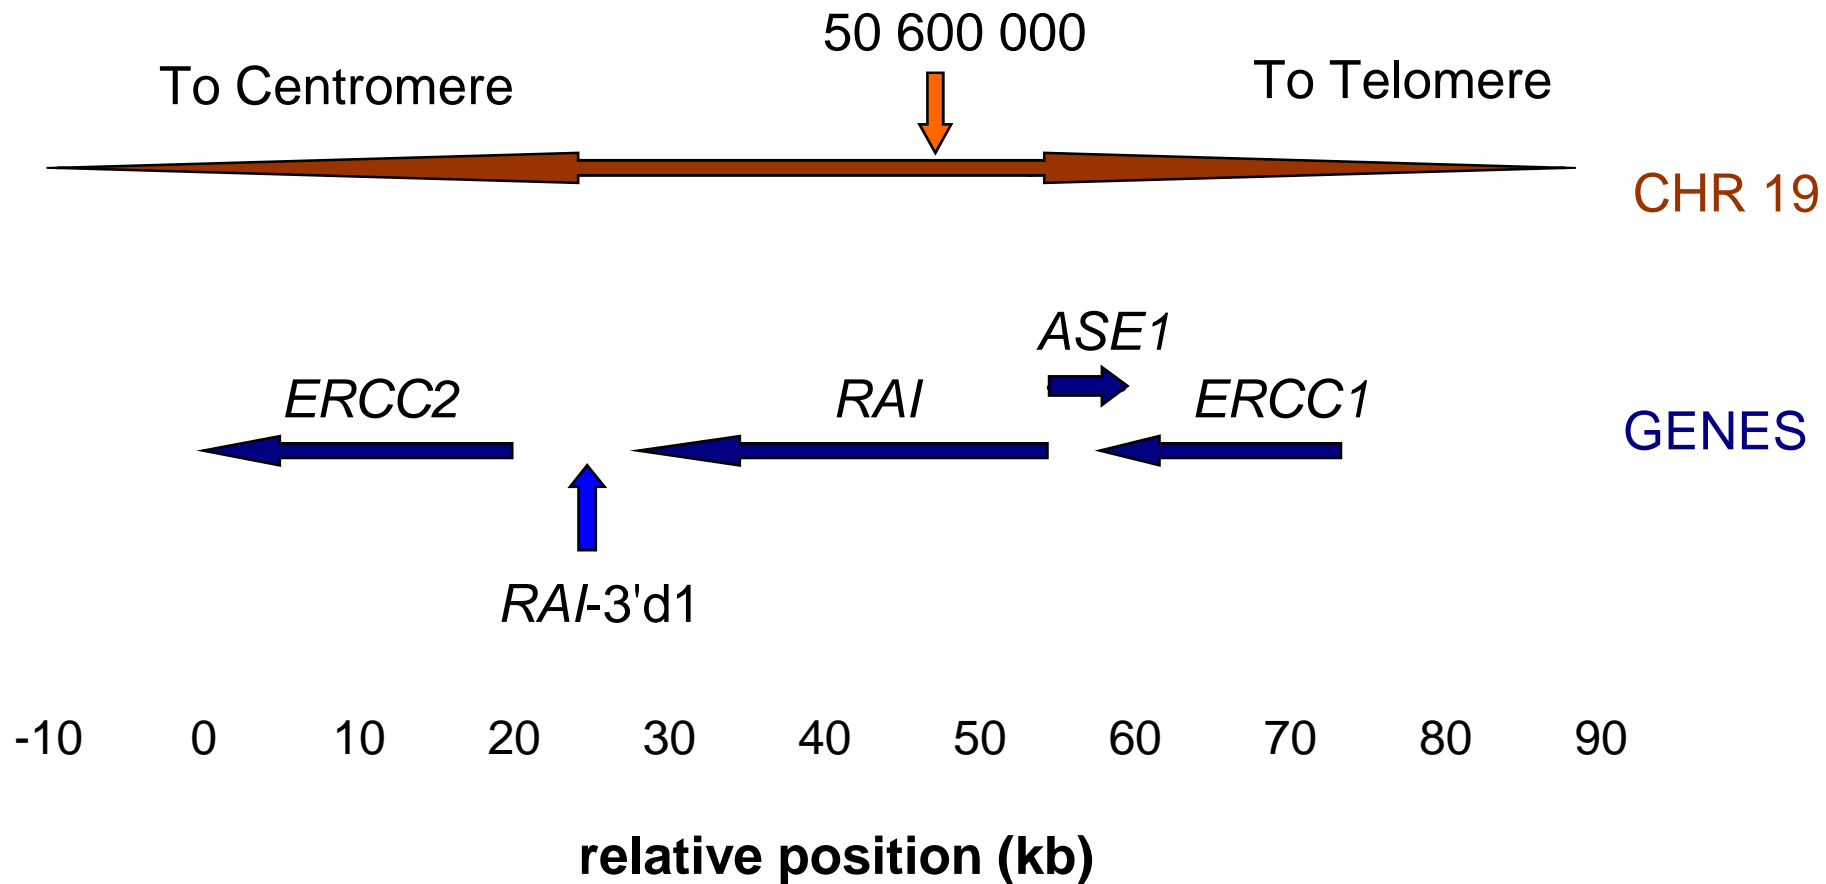

Supplement: MOESM1 [file 9450646]
